# Supplementary material for: A New Laccase of Lac 2 from the White Rot Fungus Cerrena unicolor 6884 and Lac 2-Mediated Degradation of Aflatoxin B1
Source: PubMed Central journal article supplement (PMC7472184; doi:10.3390/toxins12080476), 2020-07-27
Supplement: toxins-12-00476-s001.pdf [file toxins-12-00476-s001.pdf]

## Supplementary Materials: A New Laccase of Lac 2 from the White Rot Fungus *Cerrena unicolor* 6884 and Lac 2-Mediated Degradation of Aflatoxin B<sub>1</sub>

Zhimin Zhou, Renkuan Li, Tzi Bun Ng, Yunyun Lai, Jie Yang and Xiuyun Ye

**Table S1.** Amino acid sequence alignment of the four conserved copper-binding sites of laccases from *Cerrena unicolor* 6884.

| Laccase | L 1   | L 2       | L 3      | L 4      |
|---------|-------|-----------|----------|----------|
| Lac 2   | IHWHG | WYHSHLSTQ | HPFHLHGH | LHCHIDWH |
| Lac 4   | IHWHG | WYHSHLSTQ | HPFHLHGH | LHCHIDWH |
| Lac 5   | IHWHG | WYHSHLSTQ | HPFHLHGH | LHCHIDWH |
| Lac 6   | IHWHG | WYHSHLSTQ | HPFHLHGH | LHCHIDWH |
| Lac 1   | IHWHG | WYHSHLSTQ | HPFHLHGH | LHCHIDWH |
| Lac 3   | IHWHG | WYHSHLSTQ | HPLHLHGH | LHCHIDWH |
|         | T2 T3 | T3 T3     | T1 T2 T3 | T3 T3 T1 |

Red part indicated the conserved amino acid sequences of copper-binding sites.

**Table S2.** Information about laccases from *Cerrena unicolor* 6884.

| Laccase & Accession number | Gene ID                 | Count & TPM <sup>1</sup>       | Length of cDNA (bp) | Annotation & Accession number                         | Identity (%) | Integrity                        |
|----------------------------|-------------------------|--------------------------------|---------------------|-------------------------------------------------------|--------------|----------------------------------|
| Lac 1<br>MT720691          | TRINITY DN7028<br>c1 g1 | 433<br>11.31725                | 1326                | laccase 1 precursor [Cerrena sp. HYB07]<br>AGK89726.1 | 86           | Lack of the start sequence of 5' |
| Lac 2<br>MT720692          | TRINITY DN5830<br>c1 g1 | 1686.99905<br>38.687008        | 1581                | laccase 2 precursor [Cerrena sp. HYB07]<br>AID59410.1 | 79           | Yes                              |
| Lac 3<br>MT720693          | TRINITY DN1838<br>c0 g1 | 711<br>30.1695                 | 1557                | laccase 3 precursor [Cerrena sp. HYB07]<br>AID59411.1 | 89           | Yes                              |
| Lac 4<br>MT720694          | TRINITY DN6894<br>c0 g2 | 6865.99573848<br>77.1251736821 | 1548                | laccase 4 precursor [Cerrena sp. HYB07]<br>AID59412.1 | 94           | Yes                              |
| Lac 5<br>MT720695          | TRINITY DN6704<br>c0 g2 | 197.999694475<br>10.057269164  | 1551                | laccase [Cerrena unicolor]<br>ALE66000.1              | 99           | Yes                              |
| Lac 6<br>MT720696          | TRINITY DN6690<br>c0 g2 | 2306.00014<br>45.060219        | 1551                | laccase [Cerrena sp. WR1]<br>ACZ58369.1               | 76           | Yes                              |

<sup>1</sup> TPM: Transcripts Per Million.

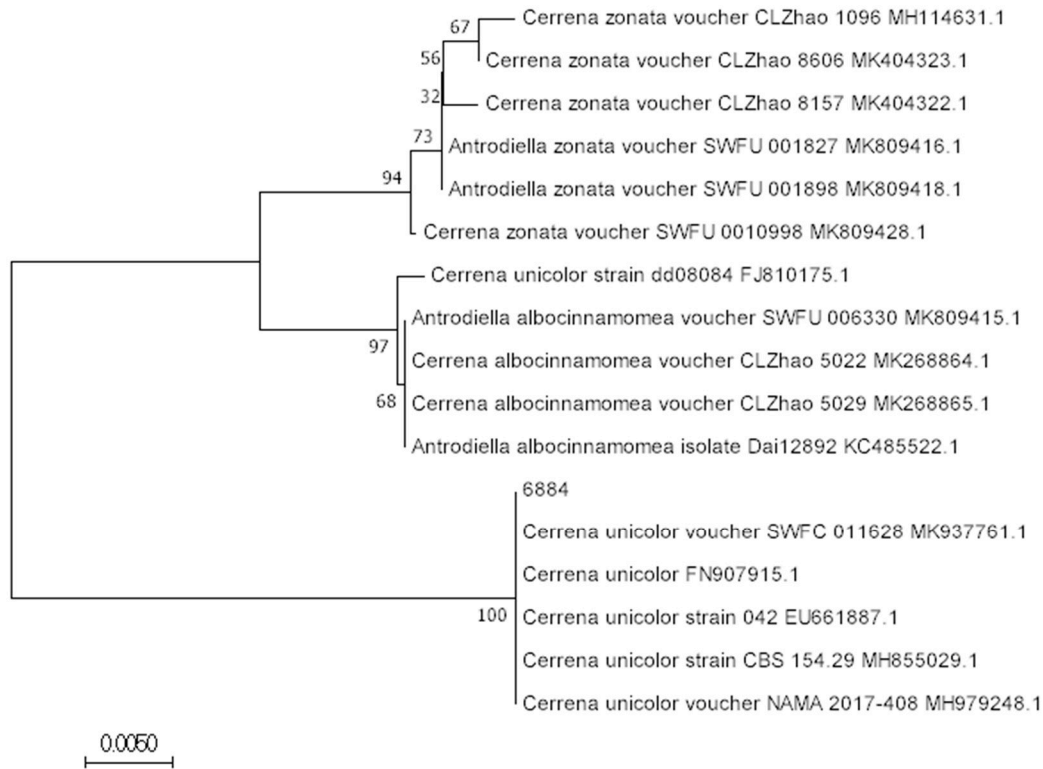

**Figure S1.** Phylogenetic relationships of *Cerrena unicolor* 6884 and related species based on ITS sequences. The numbers following the strains are accession numbers of ITS sequences. Bootstrap values at nodes are percentages of 1,000 replicates. Scale bar indicates base substitutions/100 bases.

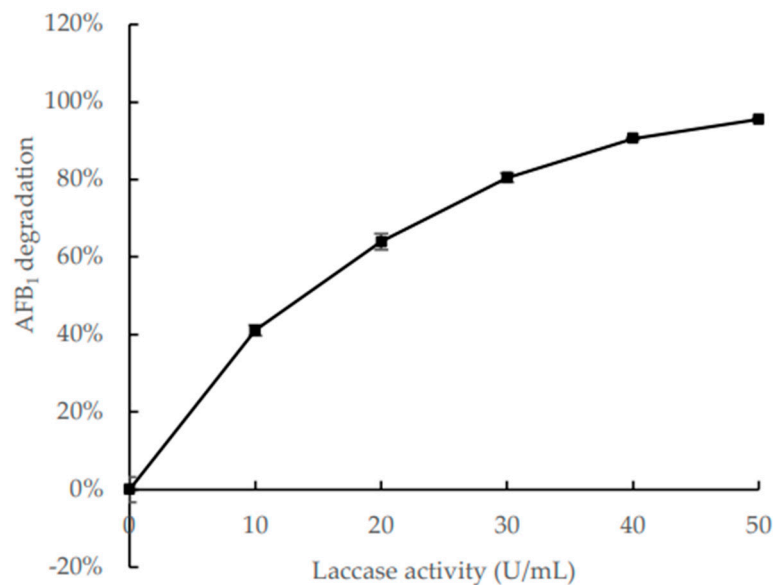

**Figure S2.** The correlation between Lac 2 from *Cerrena unicolor* 6884 and aflatoxin B<sub>1</sub> (AFB<sub>1</sub>) degradation. AFB<sub>1</sub> (5 µg/mL) was individually incubated with Lac 2 ranging from 0 U/mL to 50 U/mL in MilliQ water at 45 °C over a period of 60 h. Incubation for 0 h were included as treatment controls. The residual AFB<sub>1</sub> of all samples above was determined by FLD on HPLC (Agilent 1260 Infinity II Series, Agilent Technologies, Waldbronn, Germany). The values represent means ± standard errors (n = 4).

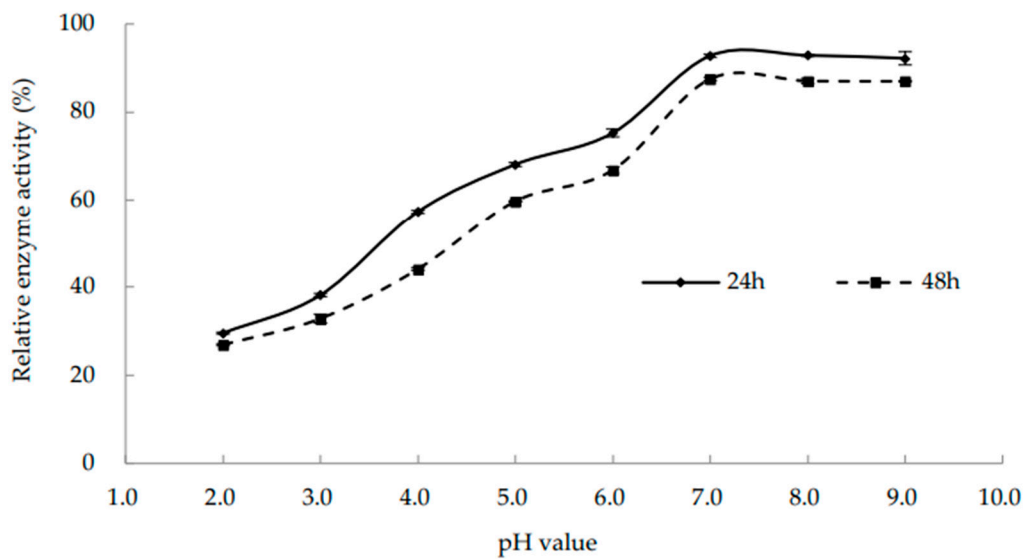

**Figure S3.** Effects of pH on stability of Lac 2. pH stability was studied by incubating the purified enzyme at different pH values in 20 mM Na<sub>2</sub>HPO<sub>4</sub>–citric acid buffers (pH 2.0–7.0), or 20 mM Na<sub>2</sub>HPO<sub>4</sub>–NaOH buffers (pH 9.0–10.0) at 25 °C for 24 h or 48 h, and the residual laccase activity was quantified at the optimum pH and temperature using ABTS as the substrate. The activity of the untreated enzyme was taken as 100%. The values represent means ± standard errors (n = 3).

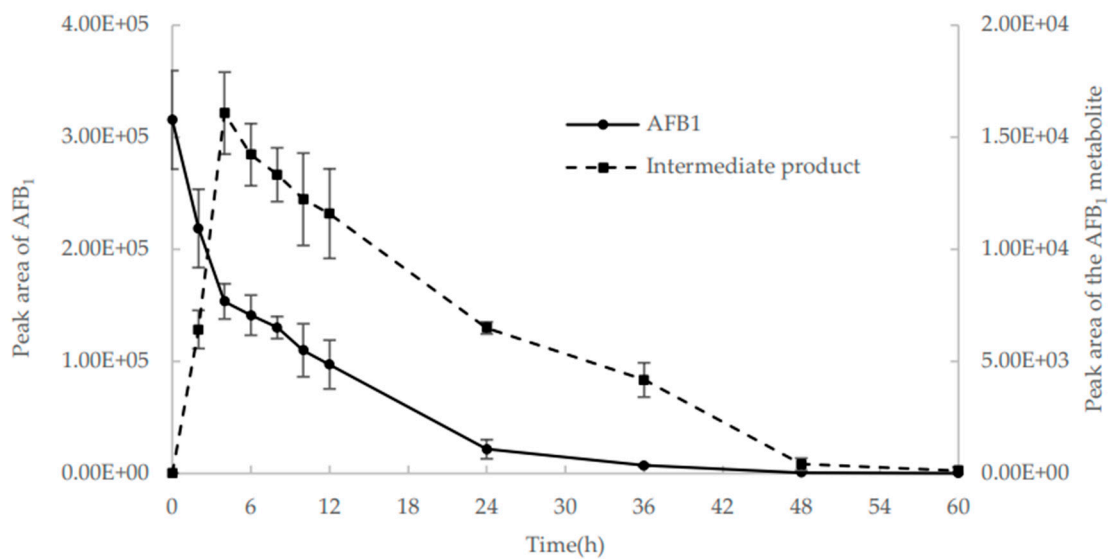

**Figure S4.** Biological degradation of aflatoxin B<sub>1</sub> (AFB<sub>1</sub>) by laccase Lac2 (50U/mL) produced by *Cerrena unicolor* at pH 7.0 and at 45 °C over a period of 0, 2, 4, 6, 8, 10, 12, 24, 36, 48, and 60 h. The residual AFB<sub>1</sub> and intermediate product were determined by UHPLC (Thermo Scientific UltiMate 3000 System, Thermo Fisher Scientific, Germering, Germany). The values represent means ± standard errors (n = 3).

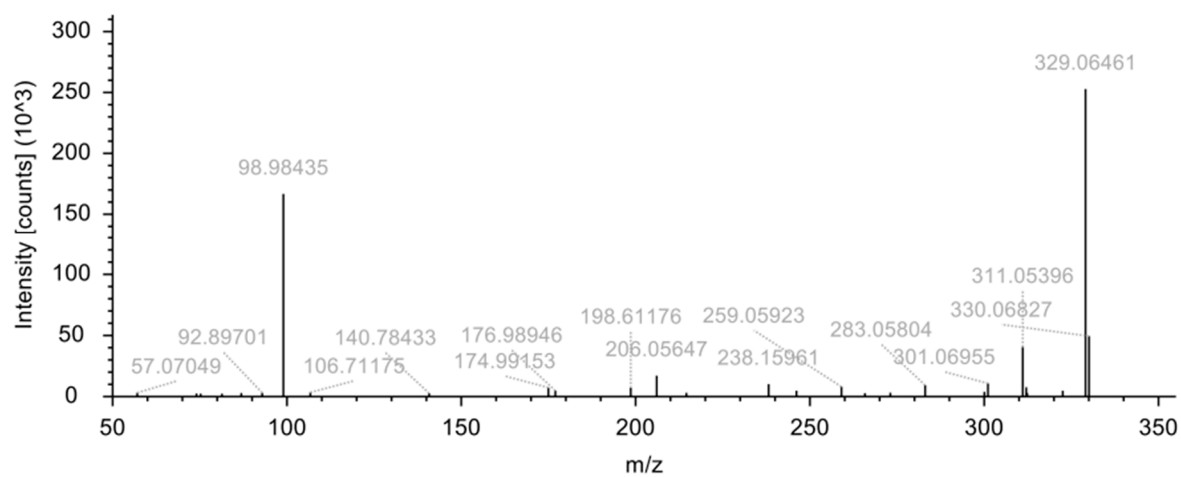

Figure S5. MS/MS spectrum of unknown AFB<sub>1</sub> metabolite.
